# Supplementary material for: One-dimensional hierarchical MoO2–MoSxhybrids as highly active and durable catalysts in the hydrogen evolution reaction
Source: Royal Society of Chemistry journal article supplement (doi:10.1039/c8dt00779a), 2018-01-01
Supplement: c8dt00779a1.pdf [file c8dt00779a1.pdf]

Electronic supplementary information (ESI)

One-Dimensional Hierarchical MoO<sub>2</sub>-MoS<sub>x</sub> Hybrids as High Active  
and Durable Catalyst in Hydrogen Evolution Reaction

Y. Qiu<sup>a+</sup>, L. Y. Chai<sup>a+</sup>, Y. Su<sup>a</sup>, P. Li<sup>a</sup>, W. Y. Yuan,<sup>b</sup> H. L. Li,<sup>a</sup> and X. H. Guo<sup>a\*</sup>

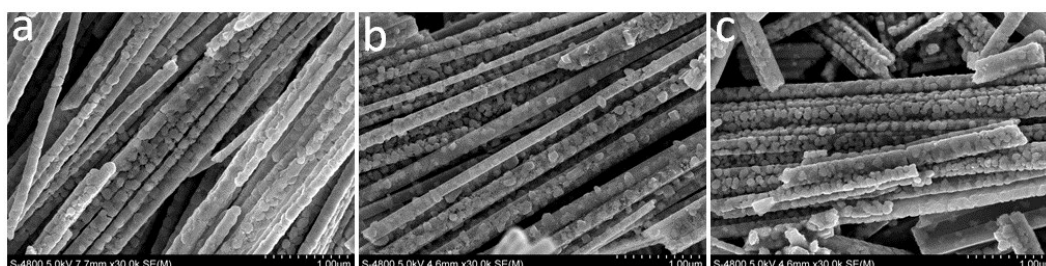

**Figure S1:** SEM images of the prepared MoO<sub>2</sub> based samples at different reaction intervals, (a) pure MoO<sub>2</sub>; (b) MoO<sub>2</sub>-MoS<sub>x</sub>-3; (c) MoO<sub>2</sub>-MoS<sub>x</sub>-6.

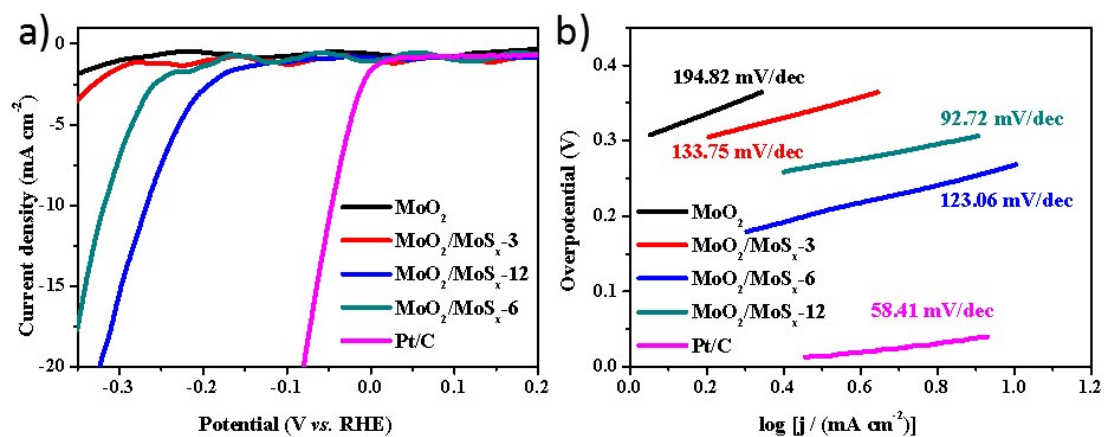

**Figure S2:** electrocatalytic performances evaluation of the prepared  $\text{MoO}_2$ -based electrodes at alkaline media (1 M KOH), (a) polarization curves; (b) the corresponding Tafel slope plots.

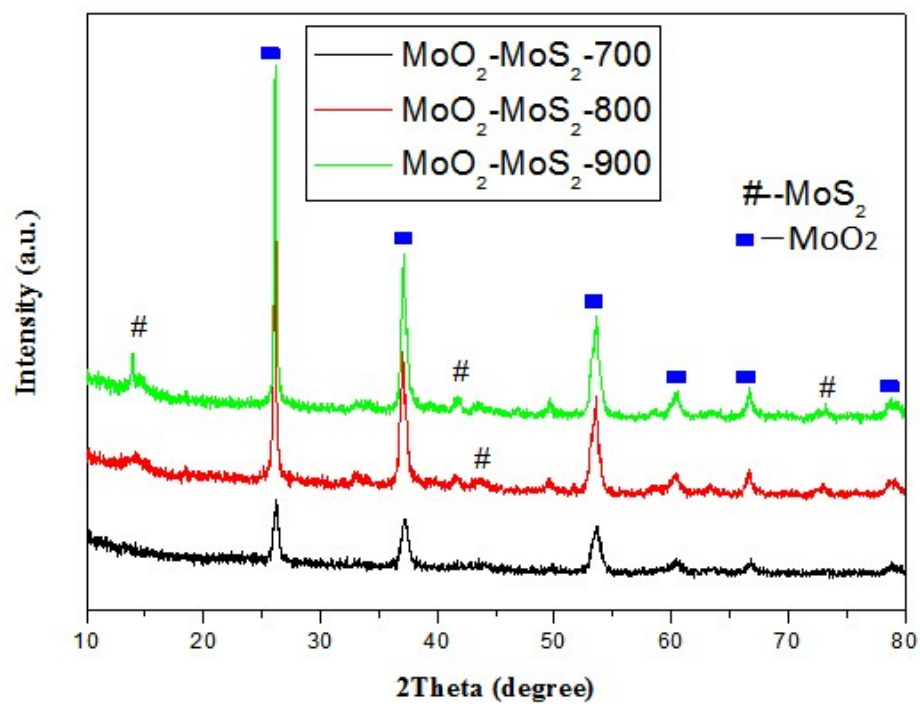

**Figure S3:** XRD patterns of the prepared  $\text{MoO}_2\text{-MoS}_2$  samples at different calcination temperatures.

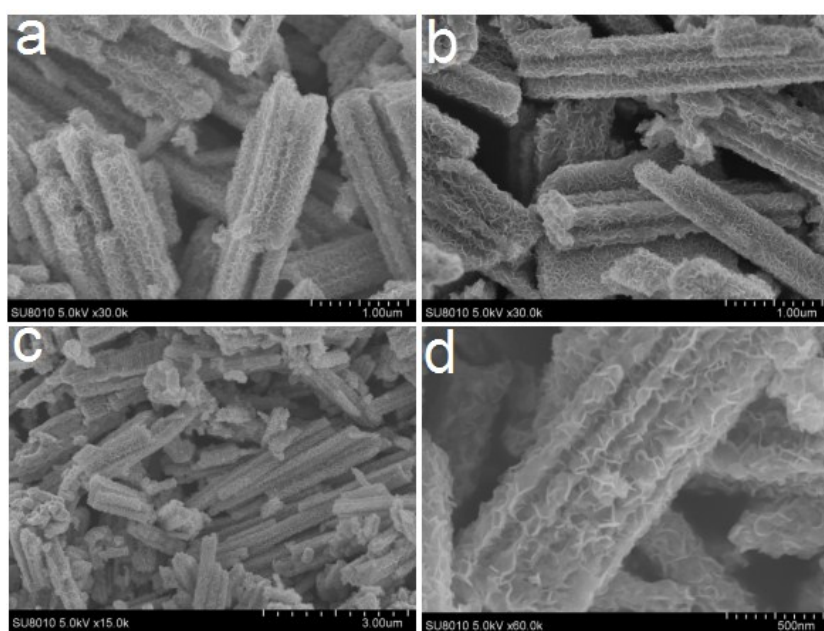

**Figure S4:** SEM images of the prepared MoO<sub>2</sub>-MoS<sub>2</sub> samples at different calcination temperatures, (a) 700; (b) 800; (c-d) 900 °C.

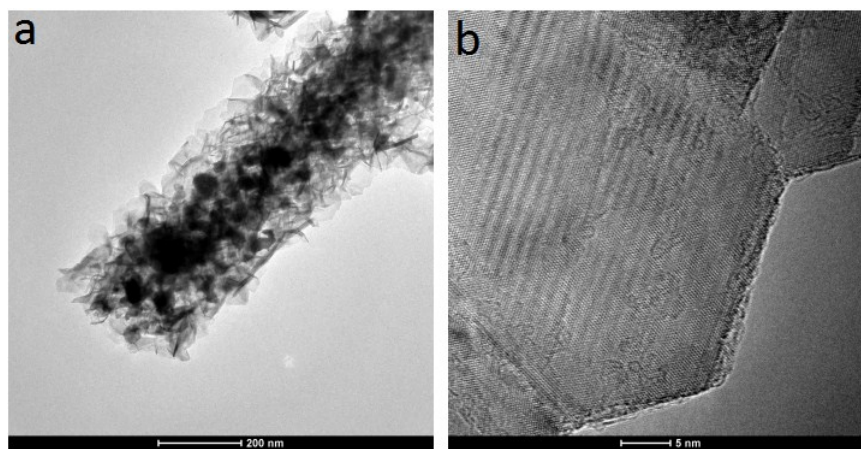

Figure S5: Morphology and structure analysis of the  $\text{MoO}_2\text{-MoS}_2$  sample formed via calcination treatment at  $800^\circ\text{C}$  furnace for 2h, a) TEM image; b) HRTEM image.

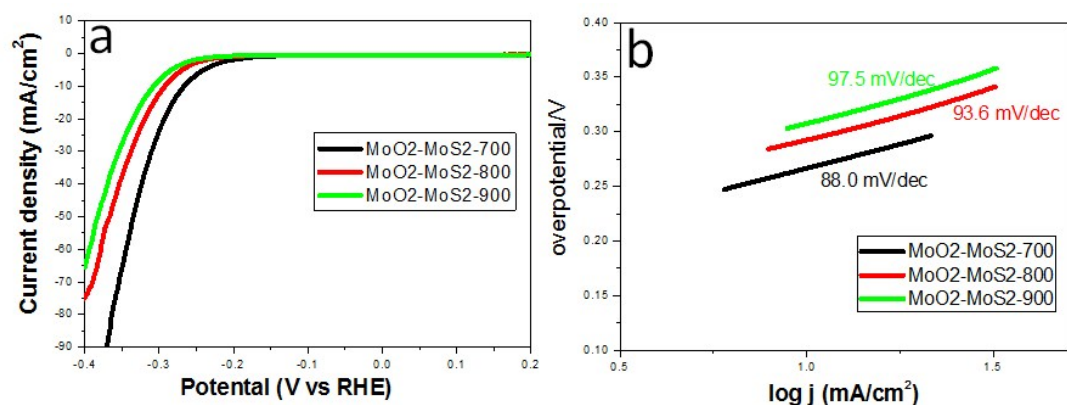

**Figure S6:** electrocatalytic performances evaluation of the prepared  $\text{MoO}_2\text{-MoS}_2$  samples at different calcination temperatures, (a) polarization curves; (b) Tafel slope plots.

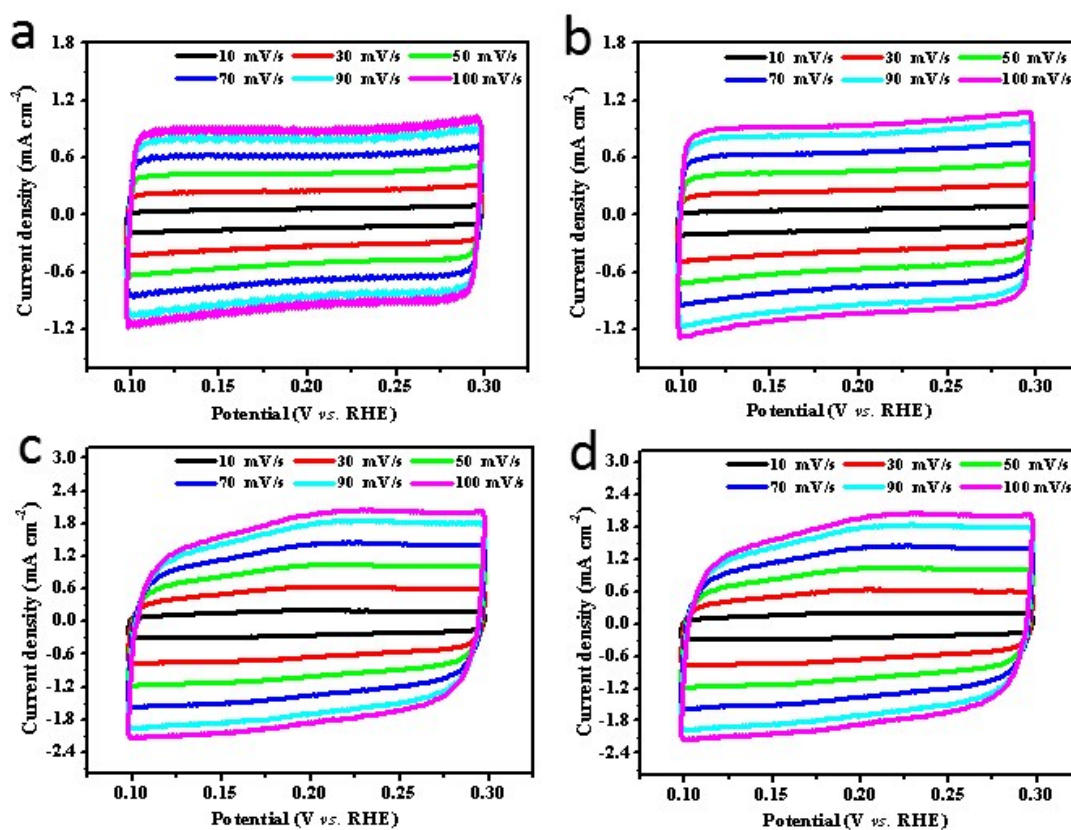

**Figure S7:** LSV curves of the prepared samples at different scan rates, (a) pure  $\text{MoO}_2$ ; (b)  $\text{MoO}_2\text{-MoS}_3$ ; (c)  $\text{MoO}_2\text{-MoS}_6$ ; (d)  $\text{MoO}_2\text{-MoS}_{12}$ .

**Figure S8:** Structural and morphology analysis for the MoO<sub>2</sub>-MoS<sub>x</sub>-12 electrode after long-time cycles, (a) Raman spectra; (b) SEM image.
